# Supplementary material for: A model for non-monotonic intensity coding
Source: PubMed Central journal article supplement (PMC4453257; doi:10.1098/rsos.150120), 2015-05-06

A

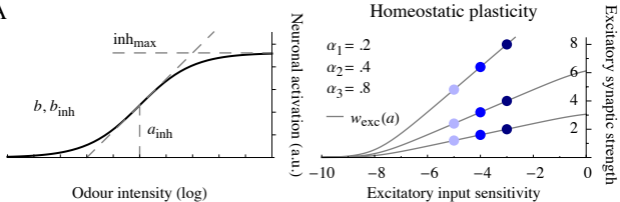

B

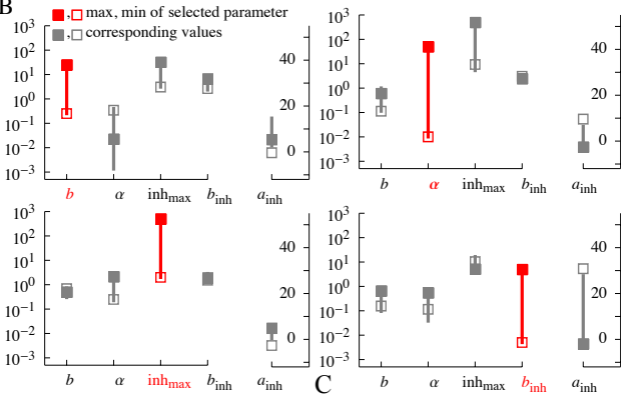

C

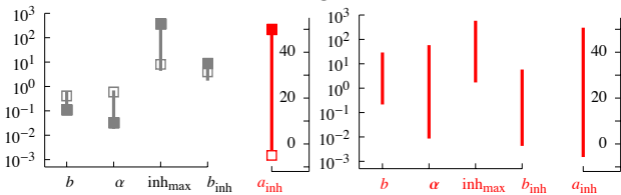

Supplement: rsos150120supp1.pdf [file rsos150120supp1.pdf]
